# Supplementary material
Source: PubMed Central journal article supplement (PMC4256497)

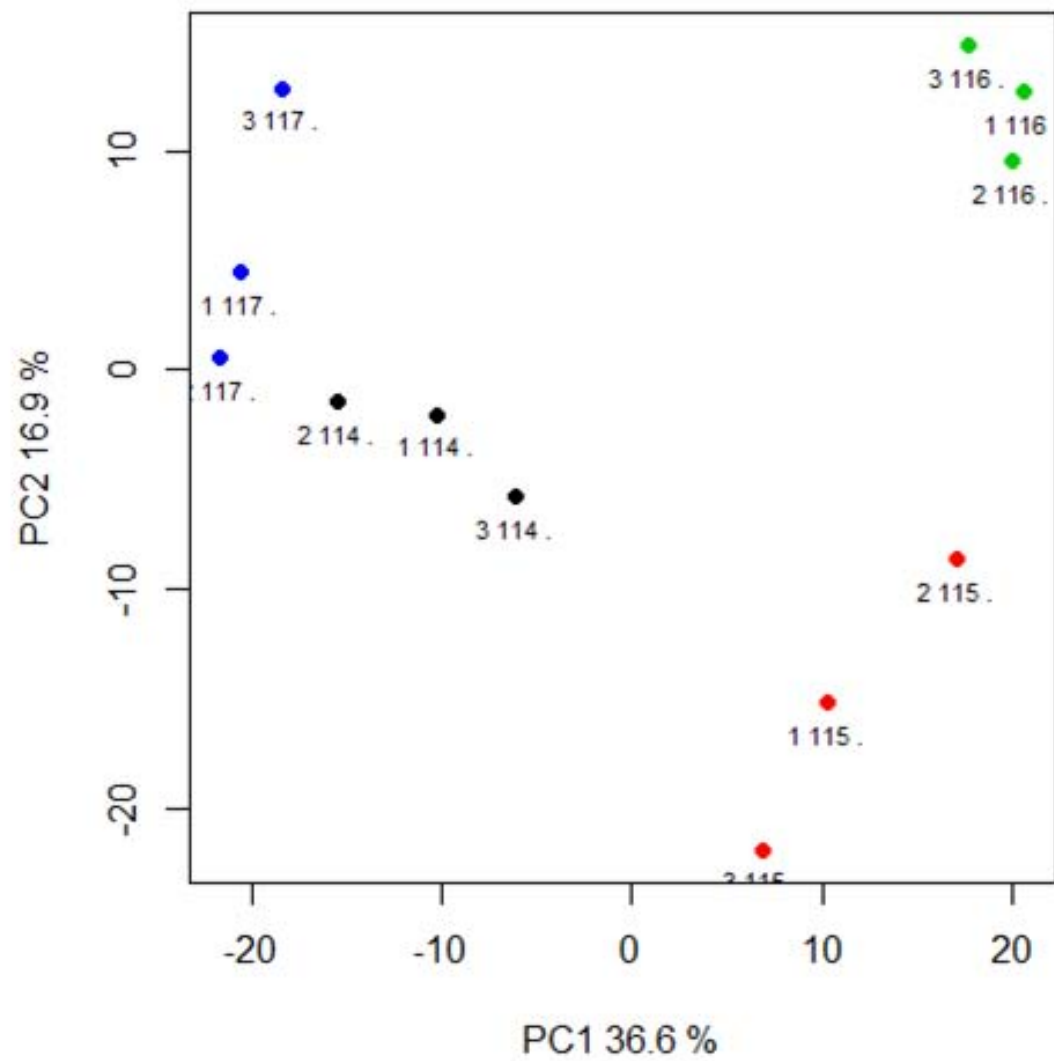

Supplement: supp_M114.040329_mcp.M114.040329-1.pdf [file supp_M114.040329_mcp.M114.040329-1.pdf]
